# Supplementary material for: Testing the efficacy of heated seawater for managing biofouling in ship’s sea chests
Source: Royal Society of Chemistry journal article supplement (doi:10.1039/d1bm00904d), 2011-01-01
Supplement: d1bm00904d1.pdf [file d1bm00904d1.pdf]

*Supporting Information for*

**Asiaticoside-laden Silk Nanofiber Hydrogels to Regulate Inflammation  
and Angiogenesis for Scarless Skin Regeneration**

Lutong Liu<sup>a</sup>, Zhaozhao Ding<sup>a</sup>, Yan Yang<sup>b</sup>, Zhen Zhang<sup>b,\*</sup>, Qiang Lu<sup>a,\*</sup>, David L. Kaplan<sup>c</sup>

*<sup>a</sup>National Engineering Laboratory for Modern Silk & Collaborative Innovation Center of Suzhou  
Nano Science and Technology, Soochow University, Suzhou 215123, People's Republic of China*

*<sup>b</sup>Department of Dermatology, Shanghai Ninth People's Hospital, Shanghai Jiaotong University  
School of Medicine, Shanghai 200011, China*

*<sup>c</sup>Department of Biomedical Engineering, Tufts University, Medford, Massachusetts 02155, United  
States*

Corresponding author:

\*Qiang Lu, E-mail: lvqiang78@suda.edu.cn

\*Zhen Zhang, Email: zz6503@126.com

**Table S1.** AC loading efficiency (LE%), loading capacity (LC%) and Zeta potential  
(AC and silk nanofiber at ratio 1:1, Silk nanofiber concentration 2 wt%)

| AC concentration<br>in methanol<br>(mg/ml) | Loading efficiency<br>(LE%) | Loading capacity<br>(LC%) | Zeta potential<br>(mV) |
|--------------------------------------------|-----------------------------|---------------------------|------------------------|
| 1                                          | 65.77±0.25                  | 3.28±0.02                 | 39.50±2.13             |
| 2                                          | 70.77±1.01                  | 7.08±0.10                 | 37.93±0.38             |
| 4                                          | 69.67±1.46                  | 13.93±0.29                | 36.74±0.38             |

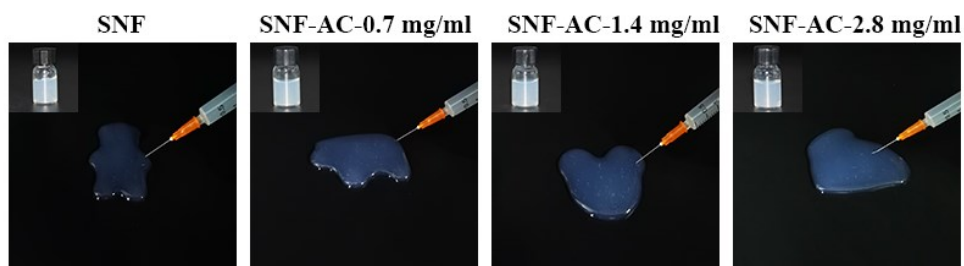

**Figure S1.** Injectable behavior of silk nanofiber hydrogels and AC-laden silk nanofiber hydrogels. SNF, silk nanofiber hydrogels; SNF-AC-0.7 mg/ml, AC-laden silk nanofiber hydrogel with AC 0.7 mg/ml; SNF-AC-1.4 mg/ml, AC-laden silk nanofiber hydrogel with AC 1.4 mg/ml; SNF-AC-2.8 mg/ml, AC-laden silk nanofiber hydrogel with AC 2.8 mg/ml.

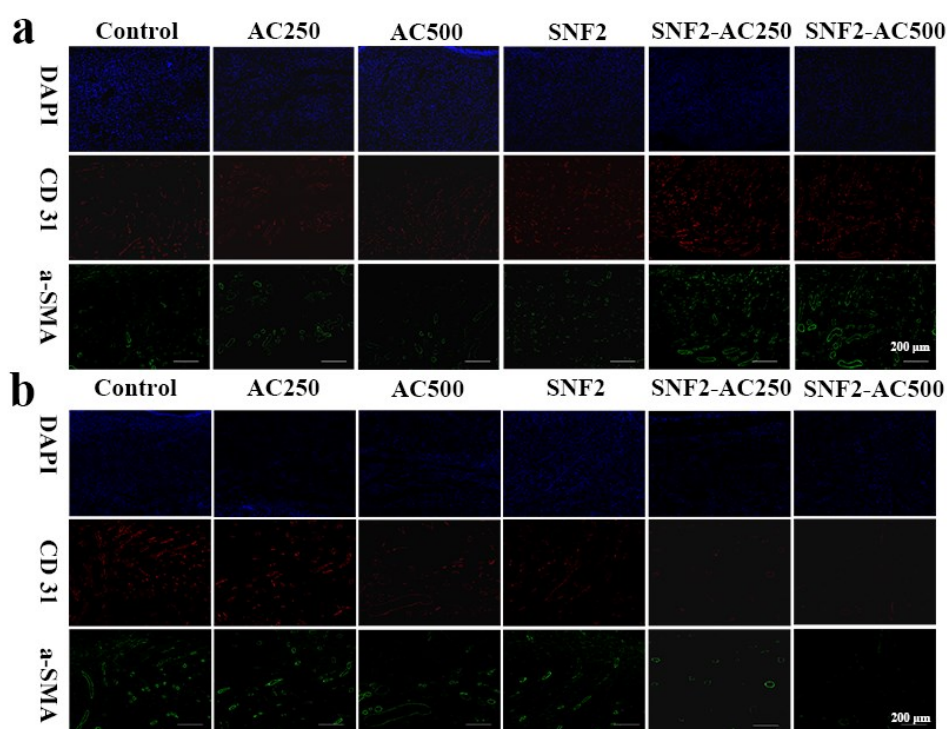

**Figure S2.** Angiogenesis at wound sites at days 7 and 21 after the surgery: (a) Representative immunofluorescence images of DAPI (blue), CD31 (red) and  $\alpha$ -SMA (green) stained tissue samples collected from the wounds at day 7. The scale bars were 200  $\mu$ m; (b) Representative immunofluorescence images of DAPI (blue), CD31 (red) and  $\alpha$ -SMA (green) stained tissue samples collected from the wounds at day 21. The scale bars were 200  $\mu$ m; Control, 0.9 % NaCl solution, SNF2, 2 wt% of silk nanofiber hydrogels; AC250, AC solution with concentration of 250  $\mu$ g/ml; AC500, AC solution with concentration of 500  $\mu$ g/ml; SNF2-AC250, AC-laden silk nanofiber hydrogel (2 wt%) with AC concentration of 250  $\mu$ g/ml; SNF2-AC500, AC-laden silk nanofiber hydrogel (2 wt%) with AC concentration of 500  $\mu$ g/ml.

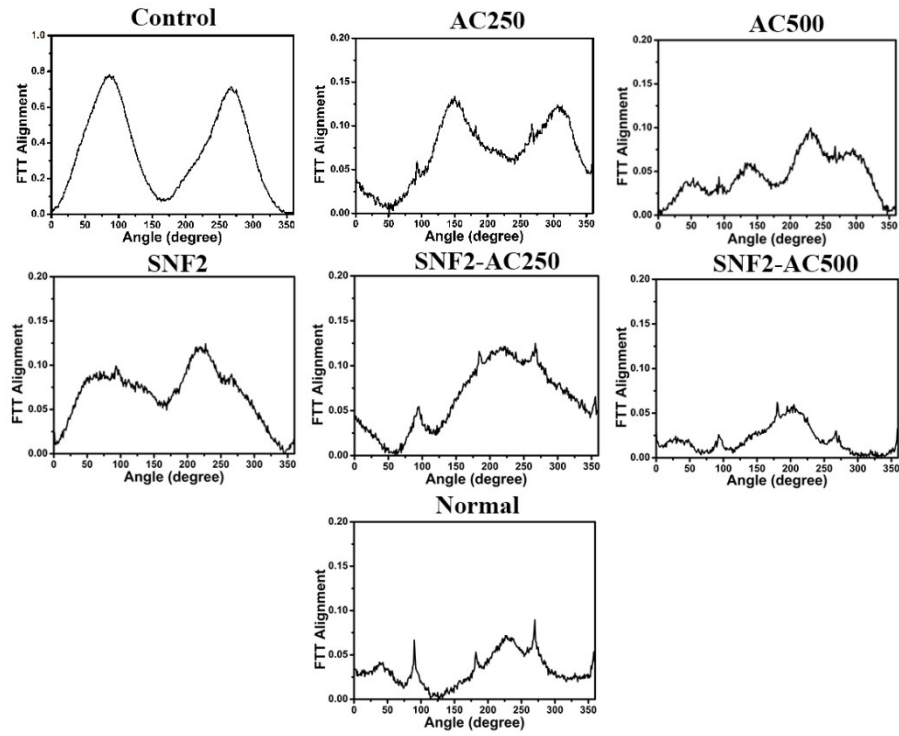

**Figure S3.** Analysis of collagen orientation degree of picrosirius red stained images at 21 day. Control, 0.9 % NaCl solution, SNF2, 2 wt% of silk nanofiber hydrogels; AC250, AC solution with concentration of 250  $\mu\text{g/ml}$ ; AC500, AC solution with concentration of 500  $\mu\text{g/ml}$ ; SNF2-AC250, AC-laden silk nanofiber hydrogel (2 wt%) with AC concentration of 250  $\mu\text{g/ml}$ ; SNF2-AC500, AC-laden silk nanofiber hydrogel (2 wt%) with AC concentration of 500  $\mu\text{g/ml}$ .
